# Supplementary material
Source: HighWire-hosted journal article supplement (http://www.cmaj.ca/highwire/filestream/58786/field_highwire_adjunct_files/0/five-psychotropic-1-at.pdf)
Supplement: five-psychotropic-1-at.pdf [file five-psychotropic-1-at.pdf]

| <b>Appendix 1: Effect of psychotropic agents on weight*<sup>1,2</sup></b>                                                                                                                                                                                                                                                                                                                                                |                                                                                                                                                                                |                                                                                            |
|--------------------------------------------------------------------------------------------------------------------------------------------------------------------------------------------------------------------------------------------------------------------------------------------------------------------------------------------------------------------------------------------------------------------------|--------------------------------------------------------------------------------------------------------------------------------------------------------------------------------|--------------------------------------------------------------------------------------------|
| Drug class                                                                                                                                                                                                                                                                                                                                                                                                               | Minimal effect on weight                                                                                                                                                       | Significant weight gain† (ranked from most to least weight gain within their class‡)       |
| Monoamine oxidase inhibitors                                                                                                                                                                                                                                                                                                                                                                                             | Tranylcypromine<br>Moclobemide                                                                                                                                                 | Phenelzine (qualitative data only)                                                         |
| Mood stabilizers/<br>anticonvulsants                                                                                                                                                                                                                                                                                                                                                                                     | Carbamazepine<br>Lamotrigine<br>Oxcarbazepine<br>Topiramate§                                                                                                                   | Valproate<br>Lithium                                                                       |
| Antipsychotics                                                                                                                                                                                                                                                                                                                                                                                                           | Amisulpride<br>Aripiprazole<br>Haloperidol<br>Fluphenazine<br>Ziprasidone<br>Perphenazine                                                                                      | Clozapine<br>Olanzapine<br>Thioridazine<br>Chlorpromazine¶<br>Quetiapine<br>Risperidone    |
| Anxiolytics                                                                                                                                                                                                                                                                                                                                                                                                              | Chlordiazepoxide<br>Nitrazepam<br>Lorazepam<br>Diazepam<br>Oxazepam<br>Buspirone                                                                                               |                                                                                            |
| Antidepressants                                                                                                                                                                                                                                                                                                                                                                                                          | Desipramine<br>Imipramine<br>Duloxetine<br>Escitalopram<br>Trimipramine<br>Venlafaxine<br>Fluvoxamine<br>Sertraline<br>Trazodone<br>Fluoxetine<br>Desvenlafaxine<br>Bupropion§ | Paroxetine<br>Mirtazapine<br>Amitriptyline<br>Citalopram<br>Nortriptyline<br>Clomipramine¶ |
| <p>*Some drugs may overlap between minimal effect on weight and significant weight gain.<br/> †Weight gain ≥ 1 kg over &gt; 12 wk unless indicated otherwise.<br/> ‡Paliperidone (atypical antipsychotic) and doxepin (tricyclic antidepressant) are not included because of insufficient evidence to rank them within their class.<br/> §May be associated with weight loss.<br/> ¶Weight gain ≥ 1 kg over ≤ 12 wk.</p> |                                                                                                                                                                                |                                                                                            |

## References

1. Dent R, Blackmore A, Peterson J, et al. Changes in body weight and psychotropic drugs: a systematic synthesis of the literature. *PLoS ONE* 2012;7:e36889 10.1371/journal.pone.0036889.
2. Dent R, Habib R, Soucy L. Psychiatric issues in the management of obesity. In: Lau DCW, Douketis JD, Morrison KM, et al.; Obesity Canada Clinical Practice Guidelines Expert Panel. 2006 Canadian clinical practice guidelines on the management and prevention of obesity in adults and children. *CMAJ* 2007;176(8 Suppl):Online-40–4. Available: [www.cmaj.ca/content/suppl/2007/09/04/176.8.S1.DC1/obesity-lau-onlineNEW.pdf](http://www.cmaj.ca/content/suppl/2007/09/04/176.8.S1.DC1/obesity-lau-onlineNEW.pdf) (accessed 2012 Nov. 12).
